**Title:** Faces under continuous flash suppression capture attention faster than objects, but without a face evoked steady-state visual potential: Is curvilinearity responsible for the behavioral effect?

**Running Title:** Nonconscious face perception and curvilinearity

Andrew D. Engell<sup>1,2</sup> and Henry Quilliam<sup>1</sup>

<sup>1</sup> Department of Neuroscience, Kenyon College, Gambier OH, USA

<sup>2</sup> Department of Psychology, Kenyon College, Gambier OH, USA

**Corresponding Author:**

Andrew D. Engell

engella@kenyon.edu

p: 740-427-5575

Department of Psychology

Samuel Mather Hall

Kenyon College

Gambier, OH 43022

## Nonconscious face perception and curvilinearity

### 1 **Highlights**

- 2 • Faces presented outside of awareness do not evoke a steady-state visually evoked  
3 potential.
- 4 • This is true for both neutral and fearful faces.
- 5 • However, faces do breakthrough interocular suppression faster than objects.
- 6 • Curvilinear objects breakthrough interocular suppression faster than rectilinear objects.
- 7 • The breakthrough time advantage for faces over objects is due to their curvilinearity.

8

## Nonconscious face perception and curvilinearity

### 1 **Abstract**

2 Face perception is a vital part of human social interactions. The social value of faces makes their  
3 efficient detection evolutionarily advantageous. It has been suggested that this might occur  
4 nonconsciously, but experimental results are equivocal thus far. Here, we probe nonconscious  
5 face perception using a novel combination of binocular rivalry with continuous flash  
6 suppression, and steady-state visually evoked potentials. In the first two experiments,  
7 participants viewed either non-face objects, neutral faces (Study 1), or fearful faces (Study 2).  
8 Consistent with the hypothesis that faces are processed nonconsciously, we found that faces  
9 broke through suppression faster than objects. We did not, however, observe a concomitant face-  
10 selective SSVEP. Study 3 was run to reconcile this paradox. We hypothesized that the faster  
11 breakthrough time was due to a mid-level visual feature, curvilinearity, rather than high-level  
12 category membership, which would explain the behavioral difference without neural evidence of  
13 face-selective processing. We tested this hypothesis by presenting participants with four different  
14 groups of stimuli outside of conscious awareness: rectilinear objects (e.g., chessboard),  
15 curvilinear objects (e.g., dartboard), faces, and objects that were not dominantly curvilinear or  
16 rectilinear. We found that faces *and* curvilinear objects broke through suppression faster than  
17 objects and rectilinear objects. Moreover, there was no difference between faces and curvilinear  
18 objects. These results support our hypothesis that the observed behavioral advantage for faces is  
19 due to their curvilinearity, rather than category membership.

20

## Nonconscious face perception and curvilinearity

### 1 **1. INTRODUCTION**

2 Faces are considered to be a special category of visual stimuli. In this view, the social and  
3 behavioral importance of these ubiquitous stimuli created an evolutionary pressure that resulted  
4 in sensory-cognitive processes and neural machinery specialized for face perception. But how  
5 special is special? The limited processing of the visual system necessarily means that some  
6 stimuli, particularly those outside of attentional focus and awareness, will only be processed  
7 superficially. Are faces equally vulnerable to this superficial treatment by the visual system, or  
8 does their evolutionary importance result in more complete processing even when presented  
9 outside of awareness? The latter is an intuitively appealing notion, but empirical support has  
10 been equivocal (Axelrod, Bar, & Rees, 2015).

11 One approach to investigating nonconscious processing relies on the interocular suppression  
12 that occurs when each eye views a different image (binocular rivalry). Visual awareness will  
13 alternate between the stimuli, such that the initially suppressed image will reach awareness and  
14 vice versa. Continuous flash suppression (CFS) is a type of binocular rivalry paradigm that  
15 extends the potential duration of the suppression from seconds to minutes (Tsuchiya & Koch,  
16 2005). Though CFS dramatically increases the duration of suppression, the suppressed images  
17 will eventually break through into awareness. Breakthrough of continuous flash suppression (b-  
18 CFS) paradigms leverage this by inferring differences in nonconscious processing if  
19 breakthrough times systematically vary across conditions (Jiang, Costello, & He, 2007).

20 This approach can be particularly powerful when paired with magneto-/electro-  
21 encephalography (M/EEG), which can potentially yield an objective and temporally high-  
22 resolution electrophysiological marker of face-selective processing. However, this approach has  
23 yet to yield conclusive evidence, one way or the other, of selective nonconscious face  
24 processing. Several studies have reported an increased face-related response during  
25 nonconscious detection or discrimination of neutral faces, emotive faces, or inverted faces (Jiang  
26 & He, 2006; Jiang et al., 2009; Sterzer, Jalkanen, & Rees, 2009; Suzuki & Noguchi, 2013;  
27 Baroni et al., 2017; Heering, Beauny, Vuillaume, Salvesen, & Cleeremans, 2019), but several  
28 others have found no such evidence (Reiss & Hoffman, 2007; Harris, Wu, & Woldorff, 2011;  
29 Navajas, Ahmadi, & Quian Quiroga, 2013; Shafto & Pitts, 2015; Kume et al., 2016). The  
30 inconsistent findings across studies can potentially be attributed to one or more methodological  
31 issues. These include: 1) inconsistent power to detect face-selective EEG signals during

## Nonconscious face perception and curvilinearity

1 nonconscious processing, 2) different blinding methods, and 3) variation in how each study  
2 operationalizes “awareness”.

3 In the current series of EEG and behavioral experiments, we investigate nonconscious face  
4 processing using a novel combination of methods in an effort to address the potential limitations  
5 of prior work. Specifically, we record steady-state visually evoked potentials (SSVEP) while  
6 presenting faces and objects in a binocular rivalry with CFS paradigm. Relative to other EEG  
7 analysis techniques (e.g., ERP), SSVEP has high SNR (Norcia, Appelbaum, Ales, Cottareau, &  
8 Rossion, 2015). SSVEP relies on the periodicity of the entire dataset and should, therefore, be  
9 less susceptible to individual differences in detection criterion. For example, a conservative  
10 detection criterion that results in a short duration in which consciously perceived faces are  
11 unreported should not result in a Type I error (i.e., an SSVEP that appears to support  
12 nonconscious processing due to the contribution of a brief period of conscious perception).

13 Here, we test the hypothesis that face processing occurs without the benefit of conscious  
14 awareness. In the first two studies, we used a novel combination of CFS and SSVEP to look for a  
15 face-selective response when faces were presented outside of awareness. Our predictions were  
16 two-fold: that faces would breakthrough CFS faster than non-faces, and that we would observe a  
17 face-selective SSVEP. Our results were inconsistent in that we observed the former, but not the  
18 latter. To reconcile this paradox, we report a third study in which we investigated whether a mid-  
19 level feature of faces – curvilinearity – was responsible for the faster breakthrough time, rather  
20 than high-level category membership, and thus the lack of face-selective neural signature.

## Nonconscious face perception and curvilinearity

### 1 **2. METHODS**

#### 2 **2.1. PARTICIPANTS**

3 Participants were recruited from the Kenyon College campus and surrounding  
4 community and compensated for their participation. All participants had normal or corrected-to-  
5 normal vision. All participants gave written and informed consent. The Kenyon College  
6 Institution Research Board approved this protocol.

##### 7 **2.1.1. PARTICIPANTS: STUDY 1**

8 Data were collected from 30 participants. Five participants were excluded from analysis.  
9 Two were excluded because they had previously seen a pilot version of the paradigm. One was  
10 excluded for failing to follow instructions, one for poor data quality, and another due to  
11 equipment failure. The remaining 25 participants included 11 men and 14 women with a median  
12 age of 21.

##### 13 **2.1.2. PARTICIPANTS: STUDY 2**

14 Data were collected from 36 participants. Eleven participants were excluded from analysis.  
15 Four were excluded because they had previous experience with the paradigm. Three were  
16 excluded due to equipment failure, one for poor data quality, two for failing to follow  
17 instructions, and one because of a metal plate in their skull. Finally, one was excluded because  
18 they experienced immediate breakthrough in all of the CFS conditions, indicating that the  
19 binocular rivalry was completely ineffective in achieving interocular suppression. The remaining  
20 24 participants included 7 men and 17 women with a median age of 21.

##### 21 **2.1.3. PARTICIPANTS: STUDY 3**

22 Data were collected from 41 participants. Six participants were excluded for disregarding or  
23 misunderstanding instructions. The remaining 35 participants included 12 men and 25 women  
24 with a median age of 21.

#### 25 **2.2. STIMULI**

26 We converted all images to greyscale, 200 x 200 jpegs with a resolution of 72 pixels per  
27 inch. We then matched the mean luminance across images ( $M = 135$ ,  $SD = 45$ ) with the SHINE  
28 MATLAB toolbox (Willenbockel et al., 2010) and added a cyan filter (00FFFF) using Photoshop  
29 CS6 (see Figure 1).

## Nonconscious face perception and curvilinearity

Continuous flash suppression stimuli consisted of a 20 x 20 matrix of 20 px<sup>2</sup> cells. Every 166.67 ms the cells cell colors (red or white) would be re-randomized This code was adapted from the code available at [https://perso.univ-lyon2.fr/~brogniar/notes/psychopy-continuous-flash/#head.flash\\_init.exp](https://perso.univ-lyon2.fr/~brogniar/notes/psychopy-continuous-flash/#head.flash_init.exp). A video demonstration of the paradigm is available at <https://osf.io/ysx8e/>.

### 2.3. EXPERIMENTAL PROCEDURE

Stimulus presentation was controlled by PsychoPy (Peirce et al., 2019) and images were displayed on a 27" LCD display with a resolution of 1920 x 1080 and a refresh rate of 60 Hz. Participants were seated ~70 cm from the display; the exact distance varied to accommodate

**Figure 1. Stimuli and Paradigm:** (*Face images are obscured for this preprint*). A schematic example of the paradigm and hypothetical neural response (a). Stimuli are presented periodically every 167 ms. Most of these images are drawn from one category (e.g., objects), but every 5<sup>th</sup> stimulus is drawn for a different category (e.g., faces). Thus, image presentation (regardless of category) is fixed at 6 Hz, whereas the ‘oddball’ stimuli (e.g., faces) are presented at one-fifth that rate, 1.2 Hz. Across the three studies, there were a total of six unique conditions. In Study 1, the *neuFace* condition (a) displayed common objects as the frequent stimuli and neutral faces as the oddballs. Study 2 included this same condition but added *fearFace* (b), in which faces displaying a fearful expression were the oddballs. Study 2 also included the *object* condition (c), in which scrambled images were displayed as the frequent stimuli and images of objects were the oddballs. Study 3 included four conditions that all used scrambled images as frequent stimuli (c). Each of the four conditions used images from different categories as the oddballs: objects in the *object* condition (as used in Study 2), neutral faces in the *face* condition, objects dominated by curvilinear edges in the *curvilinear* condition, and objects dominated by rectilinear edges in the *rectilinear* condition.

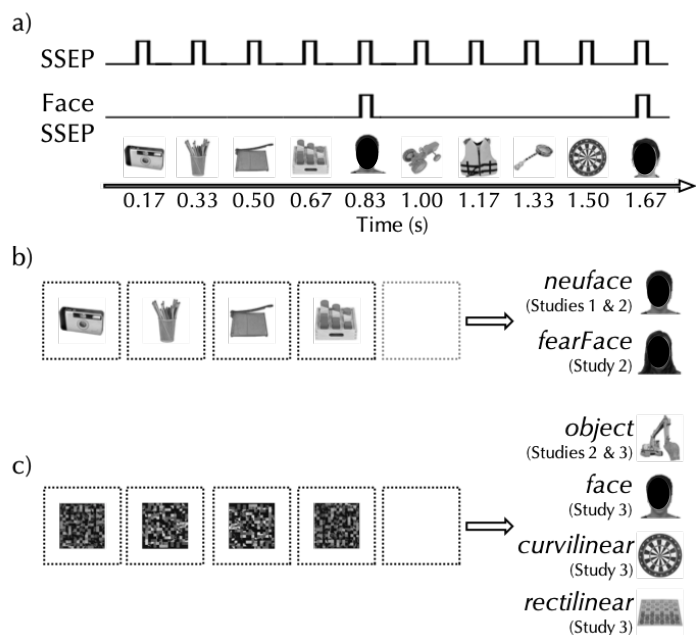

participant comfort. Interocular suppression was achieved using red-cyan anaglyph glasses, which the participants wore throughout the experiment.

## Nonconscious face perception and curvilinearity

1 All trials began with an instruction screen that directed participants to press a button the  
2 moment they became aware of any images other than the CFS. The participant began the  
3 experiment with a button press, at which point a red fixation cross, centered within a black 500 x  
4 500 px frame appeared at the center of the display. The frame and fixation cross remained  
5 onscreen throughout the presentation. The CFS began after three seconds, and the presentation of  
6 stimuli began two seconds after that. Images were presented at 400 x 400 px. Opacity was  
7 reduced from 50% (which would be the maximum for double exposure with the continuous  
8 flash) to 20% to facilitate suppression. Each image remained on screen for 166.67 ms (10 frames  
9 at 16.67 ms per frame refresh), with an oddball stimulus presented as every fifth image. Thus,  
10 image presentation was at 6 Hz, whereas oddball presentation was at 1.2 Hz (Figure 1). This  
11 image presentation timing was modeled after several recent reports (see Norcia et al., 2015).  
12 Moreover, continuous flash has been found most effective at achieving suppression at  
13 frequencies less than 10 Hz (Han, Lunghi, & Alais, 2016; Han et al., 2016; Zhan, Engelen, & de  
14 Gelder, 2018), particularly at or around 6 Hz (Zhu, Drewes, & Melcher, 2016; Zhan et al., 2018).  
15 Presentation would terminate after 50 cycles of four non-oddball and one oddball image or upon  
16 the participant indicating awareness of the suppressed images. The presentation order of the  
17 conditions was randomized across participants, but the three runs per condition were always  
18 presented sequentially. In Studies 1 and 2, there were complimentary conditions during which  
19 there was no CFS (*noCFS*) and therefore all images were consciously perceived. These *noCFS*  
20 condition runs were always presented at the end of the experimental session after the participant  
21 had completed all of the *CFS* conditions.

22 Note, the stimulus presentation rate and the flash rate were both 6 Hz. For studies 1 and 2,  
23 this means that any SSVEP to frequent image presentation was confounded with any SSVEP  
24 response to the CFS. We accepted this limitation because prior work (Han & Alais, 2018), and  
25 our pilot study observations, showed that suppression is most effective when the CFS frequency  
26 is matched to the stimulus presentation frequency. Critically, SSVEP to the oddball stimuli of  
27 interests is independent of any response to the CFS. The sole exception would be common  
28 harmonics of the oddball and CFS SSVEPs (e.g., the fourth harmonic of the oddball frequency is  
29 the same as the CFS fundamental frequency), but these were not included in analysis.



## Nonconscious face perception and curvilinearity

### 1 **2.3.1. EXPERIMENTAL PROCEDURE: STUDY 1**

2 Study 1 was composed of two conditions, *neuFace*, in which objects were displayed as the  
3 frequent stimuli and neutral faces as the oddball stimuli, presented either with or without  
4 continuous flash suppression (e.g., “*neuFace\_noCFS*”). Object and face images came from the  
5 set made available by Brady, Konkle, Alvarez, and Oliva (2008) and the “MR2 Face Database”  
6 (Strohming et al., 2016), respectively. We selected 200 object images, excluding those that  
7 suggested animacy (e.g., dolls, toy animals) or any with a face-like appearance. We randomly  
8 selected 50 of the 74 faces available in the MR2 Face database.

### 9 **2.3.2. EXPERIMENTAL PROCEDURE: STUDY 2**

10 Study 2 was composed of six conditions: *neuFace*, *fearFace*, and *object*, each presented  
11 either with or without continuous flash suppression (e.g., “*neuFace\_noCFS*”). The *neuFace*  
12 condition was identical to the *neuFace* condition of Study 1. The *fearFace* condition displayed  
13 objects as the frequent stimuli and fearful faces as the oddball stimuli. Fearful faces oriented  
14 directly forward were taken from The Averaged Karolinska Directed Emotional Faces  
15 (Lundqvist & Litton, 1998) stimulus set. In the *object* condition, grid scrambled objects were  
16 displayed as the frequent stimuli and objects as the oddball stimuli. Images were scrambled in  
17 MATLAB by dividing the image into a 20 x 20 matrix and then randomly shuffling the location  
18 of each cell in the matrix.

### 19 **2.3.3. EXPERIMENTAL PROCEDURE: STUDY 3**

20 Study 3 was composed of four conditions: *face*, *object*, *curvilinear*, and *rectilinear*. In all  
21 conditions, scrambled objects were displayed as the frequent stimuli. In the *face* condition,  
22 oddball images were seven neutral face images from the MR2 set described above. In the *object*  
23 condition, oddball images were seven common objects (e.g., backhoe) that were selected for not  
24 being dominantly curvilinear or rectilinear. In the *curvilinear* condition, oddball images were  
25 seven common curvilinear objects (e.g., dartboard). In the *rectilinear* condition, oddball images  
26 were seven common rectilinear objects (e.g., chessboard).

### 27 **2.4. EEG ACQUISITION AND PREPROCESSING**

28 Continuous biopotential signals were recorded using the ActiveTwo BioSemi amplifier  
29 system (BioSemi, Amsterdam, The Netherlands). EEG was acquired from 64 scalp electrodes  
30 arranged in the 10/20 system. Two external electrodes were placed on the mastoids to be used as

## Nonconscious face perception and curvilinearity

1 an offline reference. Two external electrodes were placed approximately 1 cm lateral and 1 cm  
2 inferior to the outer canthus of the left eye to record the horizontal and vertical electrooculogram  
3 (EOG), respectively.

4 All signals were digitized and recorded on an Apple Mac Mini running ActiView  
5 software (BioSemi) at a sampling rate of 2048 Hz. Off-line preprocessing and analysis were  
6 conducted with the EEGLAB (Swartz Center for Computational Neuroscience, La Jolla, CA,  
7 USA), and LETSWAVE6 (<https://www.letswave.org/>) MATLAB toolboxes, respectively.

8 Data were imported into EEGLAB, downsampled to 256 Hz, and bandpass filtered with a  
9 4th order Butterworth filter with cutoffs of .01 – 100 Hz. Data were then cropped to only include  
10 the 41.67 s of stimulation plus an additional 1 s window before and after. For each run, the PREP  
11 pipeline (Bigdely-Shamlo, Mullen, Kothe, Su, & Robbins, 2015) was used to identify and  
12 interpolate bad channels and establish a “true” average reference. Runs in which more than ten  
13 channels required interpolation were excluded from subsequent analysis. In Study 1, 24% and  
14 20% of runs were excluded from the CFS and noCFS conditions, respectively. In Study 2, the  
15 range of excluded runs across all six conditions was 10.64 - 18.31%.

### 16 **2.5. ANALYSIS**

#### 17 **2.5.1. ANALYSIS: BEHAVIOR**

18 The breakthrough time during continuous flash suppression was compared to the maximum  
19 run duration by subtracting the former from the latter. Therefore, a larger value indicates a faster  
20 breakthrough of interocular suppression. In Study 1, we evaluated whether the breakthrough time  
21 was greater than zero using a one-sided one-sample *t*-test. In Studies 2 and 3, we evaluated  
22 whether the breakthrough time varied across conditions with one-way repeated-measures  
23 ANOVAs and Bonferroni corrected pairwise comparisons. The Greenhouse–Geisser correction  
24 was used to correct for any violations of sphericity. ANOVA results were explicated with one-  
25 way paired-samples *t*-tests.

#### 26 **2.5.2. ANALYSIS: EEG**

27 The preprocessed data were imported into LETSWAVE6 (<https://www.letswave.org/>) and  
28 segmented into epochs that included twelve full cycles (10 s), starting with the third image of the  
29 second cycle and ending with the second image of the twelfth cycle. For complete 50-cycle runs  
30 (e.g., those without flash suppression), this resulted in four 12-cycle epochs per run. For runs that

## Nonconscious face perception and curvilinearity

1 were terminated early due to CFS breakthrough, the maximum number of non-overlapping 12-  
2 cycle epochs were extracted and the remainder discarded. The decision to discard remainder  
3 cycles was motivated by the need for sufficient frequency resolution. A 12-cycle run yields a  
4 frequency resolution of 0.1 Hz ( $f \text{ resolution} = 1/\text{duration} = 1/10 = .01 \text{ Hz}$ ).

5 The 12-cycle epochs were averaged for each participant and condition. In an effort to  
6 match the SNR of the *noCFS* and *CFS* conditions, the number of epochs included in each  
7 participant's condition averages was determined by the maximum number of available epochs in  
8 the *CFS* condition.

9 After discarding participants with fewer than one full cycle and runs with an excessive  
10 number of noisy channels, the following sample sizes were available for SSVEP analysis. In  
11 Study 1: *neuFace* (N=19). In Study 2: *neuFace* (N=20), *fearFace* (N=19), *object* (N=20). Note,  
12 these Study 2 samples represent subsets of the same 22 participants, with 17 participants in  
13 common across all conditions.

14 A fast-Fourier transform (FFT) was applied to the average time-series of 12 cycles for  
15 each participant and condition. The results were then baseline corrected by subtracting the  
16 surrounding 16 bins (8 bins on each side) excluding the local maximum and minimum. We chose  
17 8 bins on each side to avoid contribution from neighboring harmonics, which occurred at  
18 multiples of 1.2 Hz, or 12 bins with our frequency resolution of .1 Hz. To facilitate visualization,  
19 each bin was *z*-normalized relative to the same range of bins described above.

20 We visually inspected the scalp distribution of power at the face evoked frequency for the  
21 *neuFace-noCFS* conditions and found the largest response at electrodes over the right  
22 occipitotemporal scalp: P8, PO8, and P10 (see Figures 3 and 4). This is consistent with several  
23 prior SSVEP studies of face perception (Ales, Farzin, Rossion, & Norcia, 2012; Boremanse,  
24 Norcia, & Rossion, 2013; Liu-Shuang, Norcia, & Rossion, 2014) and so these electrodes were  
25 selected as the region of interest for subsequent analysis. The statistical tests described below  
26 were run on the average of the first and second harmonics averaged across all three sites.

27 We used Bayesian one-sample *t*-tests (Jeffreys, 1961) as implemented in JASP 0.10.2  
28 (JASP Team, 2019) to test whether the SSVEP was greater than zero in either the  
29 *neuFace\_noCFS* or *neuFace* conditions. We used one-sample *t*-tests rather than paired-sample *t*-  
30 tests or repeated-measures ANOVAs because we were interested in whether either condition  
31 evoked a significant response, not whether the magnitude of any such response varied as a

## Nonconscious face perception and curvilinearity

1 function of condition. For example, a paired-samples *t*-test might show that the SSVEP during  
2 conscious perception was larger than during nonconscious perception, but this would not tell us  
3 whether the latter evoked a response greater than zero.

4 Complimentary frequentist one-sample *t*-tests were also performed.

5

6

## Nonconscious face perception and curvilinearity

### 1 3. RESULTS

#### 2 3.1. STUDY 1: BEHAVIORAL RESULTS

3 Across all participants (N=25) the breakthrough time during continuous flash suppression  
4 was significantly faster than the full run duration ( $M_{\text{diff}} = 12.59$  s,  $SD = 12.06$ ; Figure 2). A one-  
5 sample one-sided  $t$ -test found that this was a significant difference ( $t(24) = 5.22$ ,  $p < .001$ ,  $d =$   
6 1.04). This was true even when we restricted the analysis to include only the subset of  
7 participants who were included in the SSVEP analysis ( $M_{\text{diff}} = 8.55$  s,  $SD = 9.21$ );  $t(18) = 4.05$ ,  $p$   
8  $< .001$ ,  $d = .93$ ).

9  
10 **Figure 2. CFS breakthrough time (b-  
11 CFS) advantage in Study 1 & 2.** (Face  
12 images are obscured for this preprint).  
13 The bar graph shows the difference  
14 between the entire possible run duration  
15 and the actual average run duration, so a  
16 larger number indicates a faster  
17 breakthrough time. Note: the b-CFS  
18 results from both Study 1 and Study 2 are  
19 presented here, but each included an  
20 independent sample and was subject to a  
21 different analysis. The results of Study 1  
22 (to the left of the vertical dashed line)  
23 were analyzed using a one-way one-  
24 sample  $t$ -test. The results of Study 2 show  
25 the results of Bonferroni corrected post-  
26 hoc tests (see Methods).

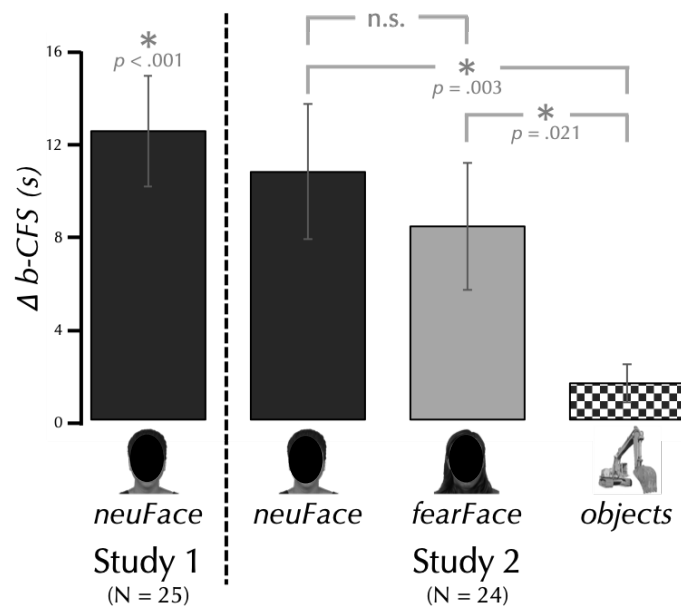

#### 29 3.2. STUDY 1: EEG RESULTS

30 Figure 3 shows the scalp distribution of power at the first and second harmonic, and the  
31 average SSVEP to the CFS and noCFS conditions. The null hypothesis for each condition states  
32 that the SSVEP is equal to zero,  $H_0: \delta = 0$ . The alternative hypothesis states that effects are  
33 positive values and thus  $\delta$  was assigned a Cauchy prior distribution with  $r = 1 / \sqrt{2}$ , truncated to  
34 allow only positive effect sizes. For the *neuFace-noCFS* condition ( $M = .328$   $\mu\text{V}$ ,  $SD = .24$ ) we  
35 found extreme evidence ( $BF = 3736$ ) that the observed data are more likely under  $H_1$  ( $\delta > 0$ ) than  
36 under  $H_0$  ( $\delta = 0$ ). In contrast, for the *neuFace* condition ( $M = .002$   $\mu\text{V}$ ,  $SD = .05$ ) we found

## Nonconscious face perception and curvilinearity

1 moderate evidence ( $BF = .281$ ) that the results are more likely (specifically, 3.56 times more  
2 likely) under  $H_0$  ( $\delta = 0$ ) than under  $H_1$  ( $\delta > 0$ ).

3  
4  
5  
6  
7  
8  
9

10 **Figure 3. Study 1 SSVEP to neutral faces with**  
11 **and without CFS:** These 3-D (larger) and 2-D  
12 (smaller inset) scalp maps display the distribution of  
13 normalized power at the first (aka fundamental) and  
14 second harmonics of the oddball presentation  
15 frequency (a). During *noCFS* there was no  
16 interocular suppression and the participants were  
17 therefore consciously aware of all presented stimuli.  
18 During *CFS* there was interocular suppression and  
19 the participants were therefore unaware of the  
20 stimuli of interest presented to the ‘suppressed’ eye.  
21 The bean plots (b) display the average amplitude of  
22 the response ( $\mu V$ ) combined across the first and  
23 second harmonics and across three electrodes of  
24 interest: P8, P10, and PO8 for each participant. For  
25 each condition, the plot displays the individual  
26 participant results (black lines), the distribution  
27 density of the results (mirrored across the vertical  
28 axis), and the mean response (red line).

29  
30  
31  
32  
33

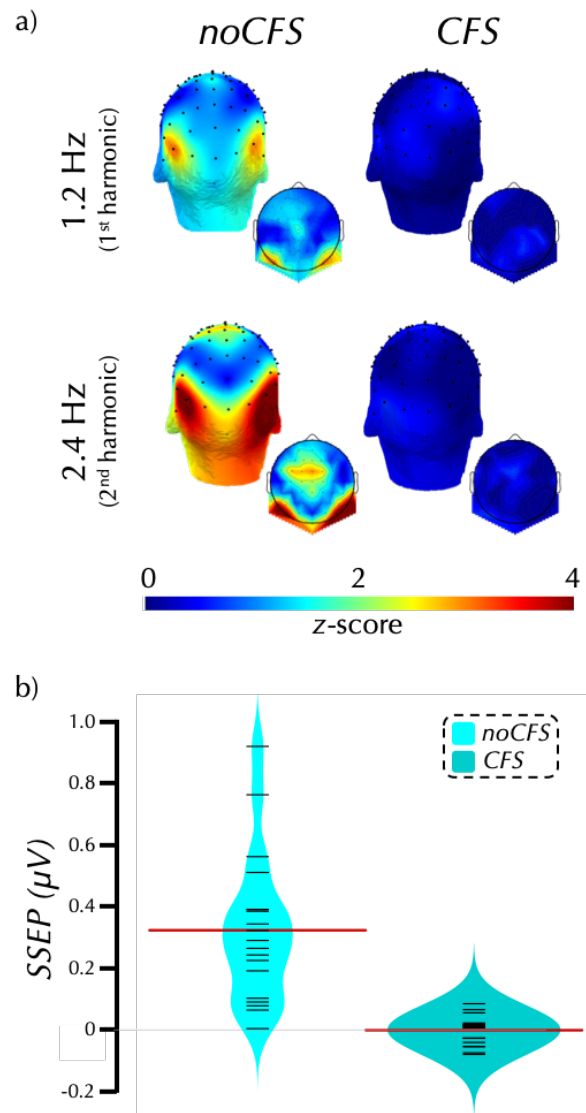

34 The results of the frequentist one-paired *t*-tests were qualitatively the same as the Bayesian  
35 tests. A significant response was evoked by *neuFace-noCFS* ( $t(18) = 5.97, p < .001, d = 1.37$ ),  
36 but not *neuFace-CFS* condition ( $t(18) = .22, p = .42$ ).

### 37 3.3. STUDY 2: BEHAVIORAL RESULTS

38 Across all participants ( $N=24$ ), a one-way repeated-measures ANOVA showed that the  
39 breakthrough times significantly varied as a function of condition ( $F(1.67, 38.3) = 9.81, p < .001$ ;  
40 Figure 2). Bonferroni corrected post-hoc tests showed that *object* breakthrough time ( $M = 1.58$  s,

## Nonconscious face perception and curvilinearity

1 SD 4.1) was significantly slower than for *neuFace* ( $M = 10.83$  s,  $SD = 14.45$ ,  $p = .003$ ,  $d = .76$ )  
2 and *fearFace* ( $M = 8.44$  s,  $SD = 13.52$ ,  $p = .021$ ,  $d = .61$ ). Breakthrough times did not differ  
3 between *neuFace* and *fearFace* ( $p = .463$ ).

4 A second repeated-measures ANOVA was run on the subset of participants who were  
5 included in the SSVEP analysis. However, only 17 of the 22 participants contributed data to all  
6 conditions, and therefore the remaining five were held out of this analysis. As with the full  
7 sample, breakthrough times significantly varied as a function of condition ( $F(1.97, 31.57) = 4.50$ ,  
8  $p = .019$ ). Bonferroni corrected post-hoc tests showed that *object* breakthrough time ( $M = 0.18$  s,  
9  $SD 0.75$ ) was significantly slower than for *neuFace* ( $M = 6.96$  s,  $SD = 10.24$ ,  $p = .038$ ,  $d = .68$ ),  
10 but not *fearFace* ( $M = 4.51$  s,  $SD = 9.82$ ,  $p = .221$ ). Breakthrough times did not differ between  
11 *neuFace* and *fearFace* ( $p = .838$ ).

### 12 3.4. STUDY 2: EEG RESULTS

13 Figure 4 shows the scalp distribution of power at the first and second harmonic, and the  
14 average SSVEP to the *CFS* and *noCFS* conditions. The null hypothesis for each of the Bayesian  
15 one-sample *t*-tests were as described for Study 1. For all three *noCFS* we found extreme  
16 evidence the observed data are more likely under  $H_1$  ( $\delta > 0$ ) than under  $H_0$  ( $\delta = 0$ ):  
17 *neuFace\_noCFS* ( $M = .353$   $\mu$ V,  $SD = .23$ ,  $BF = 30,161$ ), *fearFace\_noCFS* ( $M = .305$   $\mu$ V,  $SD =$   
18  $.17$ ,  $BF = 72,251$ ), *object\_noCFS* ( $M = .573$   $\mu$ V,  $SD = .31$ ,  $BF = 290,318$ ). In contrast, for each  
19 of the *CFS* conditions we found anecdotal to moderate evidence that the observed data are more  
20 likely under  $H_0$  ( $\delta = 0$ ) than under  $H_1$  ( $\delta > 0$ ): *neuFace\_CFS* ( $M = -.019$   $\mu$ V,  $SD = .17$ ,  $BF =$   
21  $.167$ ), *fearFace\_CFS* ( $M = .022$   $\mu$ V,  $SD = .10$ ,  $BF = .614$ ), *object\_CFS* ( $M < .001$   $\mu$ V,  $SD =$   
22  $.06$ ,  $BF = .243$ ). Figure 3 shows the scalp distribution of power at the first and second harmonic,  
23 and the average SSVEP to the *CFS* and *noCFS* conditions.

24 The results of the frequentist one-sample *t*-tests were qualitatively the same as the Bayesian  
25 tests. A significant response was evoked by all of the *noCFS* conditions: *neuFace-noCFS* ( $t(19)$   
26  $= 6.97$ ,  $p < .001$ ,  $d = 1.56$ ), *fearFace-noCFS* ( $t(19) = 7.65$ ,  $p < .001$ ,  $d = 1.75$ ), *object-noCFS*  
27 ( $t(19) = 8.27$ ,  $p < .001$ ,  $d = 1.85$ ). In contrast, the *CFS* conditions did not yield any significant  
28 effects ( $ps \geq .33$ ).

29  
30  
31



## Nonconscious face perception and curvilinearity

**Figure 4. Study 2 SSVEP:** These 3-D (larger) and 2-D (smaller inset) scalp maps display the distribution of normalized power at the first harmonic (aka fundamental) of the oddball presentation frequency (a). During *noCFS* there was no interocular suppression and the participants were therefore consciously aware of all presented stimuli. During *CFS* there was interocular suppression and the participants were therefore unaware of the stimuli of interest presented to the ‘suppressed’ eye. The bean plots (b) display the average amplitude of the response ( $\mu\text{V}$ ) combined across the first and second harmonics and across three electrodes of interest: P8, P10, and PO8 for each participant. For each condition, the plot displays the individual participant results (black lines), the distribution density of the results (mirrored across the vertical axis), and the mean response (red line).

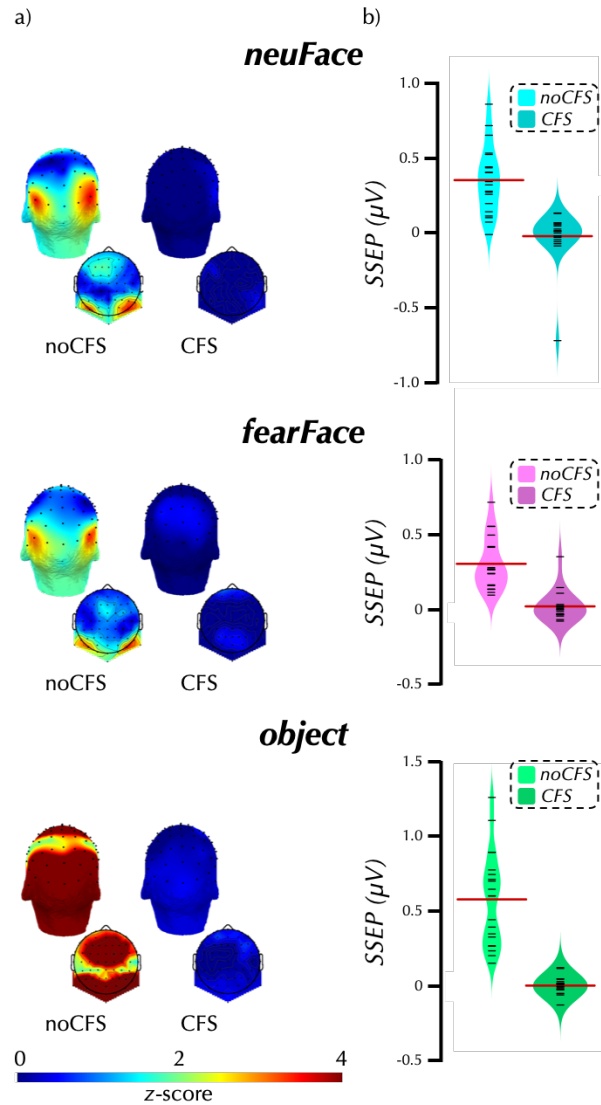

### 3.5. COMBINED STUDY 1 AND STUDY 2 EEG RESULTS

In order to maximize SNR and thus detection sensitivity, we analyzed the combined *neuFace* SSVEP data from Study 1 and Study 2 resulting in a larger sample of  $N = 39$ . For the *neuFace\_noCFS* condition ( $M = .341 \mu\text{V}$ ,  $SD = .23$ ) we found extreme evidence ( $BF = 6.699e+8$ ) that the observed data are more likely under  $H_1$  ( $\delta > 0$ ) than under  $H_0$  ( $\delta = 0$ ). In contrast, for the *neuFace* condition ( $M = -.009 \mu\text{V}$ ,  $SD = .13$ ) we found moderate evidence ( $BF = .128$ ) that that observed the results are more likely (specifically, 7.81 times more likely) under  $H_0$  ( $\delta = 0$ ) than under  $H_1$  ( $\delta > 0$ ).



## Nonconscious face perception and curvilinearity

1 The results of the frequentist one-sample  $t$ -tests were qualitatively the same as the Bayesian  
2 tests. A significant response was evoked by *neuFace-noCFS* ( $t(38) = 9.25, p < .001, d = 1.48$ ),  
3 but not *neuFace-CFS* condition ( $t(38) = .43, p = .67$ ).

### 4 3.6. STUDY 3: BEHAVIORAL RESULTS

5 Across all participants ( $N=35$ ), a one-way repeated-measures ANOVA showed that  
6 breakthrough time was significantly affected by condition ( $F(2.81, 95.57) = 3.60, p = .018$ ;  
7 Figure 5). One-way paired-samples  $t$ -tests were used for four planned comparisons. The  
8 breakthrough time for *faces* ( $M = 15.56$  s,  $SD 14.52$ ) was significantly faster than for *objects* ( $M$   
9  $= 10.60$  s,  $14.53$ ;  $t(34) = 1.71, p = .048, d = .29$ ), but not *curvilinear* objects ( $M = 18.69$  s,  $SD$   
10  $15.57$ ;  $p = .910$ ). The breakthrough time for *curvilinear* objects was significantly faster than for  
11 both *objects* ( $t(34) = 2.81, p = .004, d = .48$ ) and *rectilinear* objects ( $M = 11.87$  s,  $12.99$ ;  $t(34) =$   
12  $2.39, p = .011, d = .40$ ).

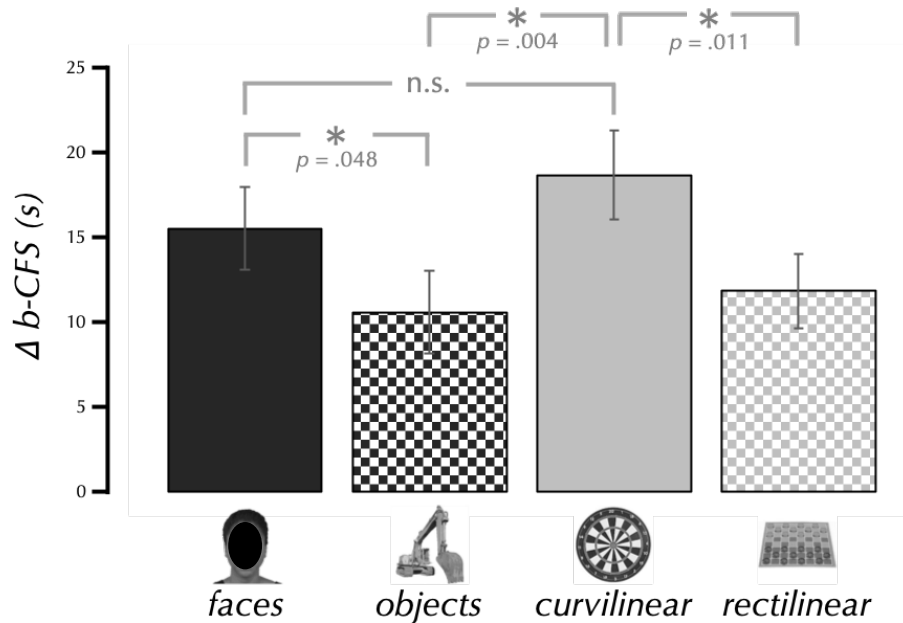

26 **Figure 5. Breakthrough time advantage in Study 3.** (Face images are obscured for this preprint). The  
27 bar graph shows the difference between the entire possible run duration and the actual average run  
28 duration. Thus, a larger number indicates a faster b-CFS. The data ( $N = 35$ ) were analyzed with four  
29 planned one-way paired-samples  $t$ -tests (see Methods).

## Nonconscious face perception and curvilinearity

### 1 **4. DISCUSSION**

2 We report two experiments that do not support the engagement of cortical face-selective  
3 regions during interocular suppression. A face-sensitive steady-state visually evoked potential  
4 (SSVEP) to neutral faces (Studies 1 & 2) or fearful faces (Study 2) was observed only when  
5 participants were aware of the stimuli. In contrast, we observed evidence of selective  
6 nonconscious processing; faces broke through interocular suppression faster than objects. We  
7 followed up on these results with a third study in which we observed faster breakthrough time for  
8 curvilinear than rectilinear objects. Moreover, the breakthrough time for curvilinear objects did  
9 not differ from neutral or fearful faces. We interpret these results as follows: 1) evidence that  
10 cortical face-selective regions are not engaged during face perception without awareness, 2) this  
11 is true for fearful, as well as neutral, faces, and 3) faster breakthrough times for faces is owed to  
12 the curvilinearity common to all faces rather than to high-level category membership.

#### 13 ***4.1. NO EEG EVIDENCE OF NONCONSCIOUS DETECTION OF NEUTRAL FACES***

14 In Studies 1 and 2 we did not find an EEG response indicating face detection when faces  
15 were presented outside of conscious awareness. At first blush, this finding is simply another  
16 result added to a conflicted literature (for a recent review, see Axelrod et al., 2015) in which  
17 some have found M/EEG signals associated with nonconscious detection (Henson,  
18 Mouchlianitis, Matthews, & Kouider, 2008; Sterzer et al., 2009; Jiang et al., 2009; Suzuki &  
19 Noguchi, 2013), whereas others have not (Reiss & Hoffman, 2007; Harris et al., 2011; Navajas et  
20 al., 2013; Shafto & Pitts, 2015; Kume et al., 2016). But, our unique combination of CFS and  
21 SSVEP addresses at least three limitations of the prior studies and therefore represent a  
22 meaningful contribution to the literature.

23 First, it is possible that the negative reports simply failed to detect a noisy, but nonetheless  
24 present, face-selective response. Here, we address that issue by taking advantage of the high  
25 signal-to-noise ratio of SSVEP (Norcia et al., 2015). Despite the higher SNR afforded by  
26 SSVEP, our results are consistent with those prior reports that failed to find an EEG marker of  
27 face processing without awareness. Moreover, we used a Bayesian analysis to test the probability  
28 of the null model given the data, rather than simply testing the probability of observing an effect  
29 if the null were true. This support for the null model is easily understood with a simple visual

## Nonconscious face perception and curvilinearity

1 inspection of the scalp distributions of power at the face presentation frequency (Figures 3 and  
2 4), which show no hint of an SSVEP.

3 Second the inconsistent findings may be owed to the different blinding methods used across  
4 experiments. Axelrod, Bar, and Rees (2015) found that EEG studies that report no evidence of  
5 nonconscious face processing tend to use variations of masking paradigms, whereas those that  
6 find evidence tend to use variations of dichotic stimulation (but see Izatt, Dubois, Faivre, &  
7 Koch, 2014; Shafto & Pitts, 2015). This might suggest a partial awareness during CFS (Mudrik,  
8 Gelbard-Sagiv, Faivre, & Koch, 2013; Gayet, Van der Stigchel, & Paffen, 2014; Stein & Sterzer,  
9 2014) that results in false positives. Here, we report evidence against face detection without  
10 awareness, despite using an approach that is ostensibly more likely to produce a positive result.

11 Third, the inconsistent findings may be owed to variation in what is considered “awareness”  
12 across studies (Faivre, Berthet, & Kouider, 2014; Peters & Lau, 2015). As with the blinding  
13 differences noted above, the concern is that differences in instructions and/or participant  
14 response biases (Rodríguez et al., 2012) could lead to false positives. That is, if participants  
15 employ a conservative detection criterion, they might view images with some degree of  
16 conscious awareness without reporting it. The current work is less susceptible to such bias  
17 because SSVEP requires continuous periodic stimulation. Therefore, a false positive would  
18 require that participants experience unreported awareness for extended durations rather than just  
19 on discrete events. In the current work, general response bias is even less likely given that  
20 participants detected faces faster than objects (Studies 2 and 3) and curvilinear objects faster than  
21 rectilinear objects (Study 3). Perhaps most importantly, any concern that a response bias might  
22 lead to Type I errors should be assuaged by the fact that we did not observe a positive SSVEP  
23 during periods which the participants did not report awareness.

### 24 **4.2. NO EVIDENCE OF NONCONSCIOUS DETECTION OF FEARFUL FACES**

25 Are emotionally relevant signals privileged relative to neutral signals? It has been proposed  
26 that affective signals are qualitatively different than neutral signals and processed via subcortical  
27 pathways (Tamietto & de Gelder, 2010; but see Pessoa & Adolphs, 2010) or, in the case of face  
28 processing, cortical pathways distinct from those that support identity processing (Haxby,  
29 Hoffman, & Gobbini, 2000; but see Calder & Young, 2005). Faivre, Berthet, and Kouider (2014)  
30 note that there is more consistent evidence for nonconscious processing of facial expression than  
31 there is for facial identity, and therefore that “The discrepancy between the processing of facial

## Nonconscious face perception and curvilinearity

1 identity and facial expressions suggests that the latter may be processed along subcortical routes  
2 that are not fully disrupted by CFS” (p. 8).

3 Support for an affective advantage comes primarily from fMRI and behavioral studies (for  
4 reviews see Sterzer, Stein, Ludwig, Rothkirch, & Hesselmann, 2014; Axelrod et al., 2015;  
5 Diano, Celegghin, Bagnis, & Tamietto, 2016), though there are also a handful of EEG reports  
6 (Jiang et al., 2009; Jessen & Grossmann, 2014). However, some have argued that carefully  
7 controlling for potential methodological confounds causes any affective advantage to disappear  
8 (Straube, Dietrich, Mothes-Lasch, Mentzel, & Miltner, 2010; Pessoa & Adolphs, 2010;  
9 Hoffmann, Mothes-Lasch, Miltner, & Straube, 2015; Hedger, Adams, & Garner, 2015; Hedger,  
10 Gray, Garner, & Adams, 2016). Schlossmacher, Junghöfer, Straube, and Bruchmann (2017)  
11 found that modulation of face-sensitive ERPs (e.g., N170) observed during conscious perception  
12 were not observed during interocular rivalry with CFS. Finally, the authors of a recent meta-  
13 analysis of behavioral experiments conclude “uncritical acceptance of the standard hypothesis,  
14 which states that threat stimuli can be identified and prioritized without awareness, is  
15 premature.” (Hedger et al., 2016, p. 961). But notably, they report that fearful faces were the  
16 only threat stimulus that consistently showed evidence of a nonconscious advantage in b-CFS  
17 paradigms. Therefore, we must entertain the possibility that there is an affective advantage in  
18 nonconscious processing with a source that is not readily detectable with EEG.

### 19 **4.3. IS THERE A SUBCORTICAL EFFECT?**

20 A limitation of EEG, and thus the current work, is that potentials generated in subcortical  
21 structures will have lower SNR due to their increased distance from recording sites on the scalp.  
22 For some structures, such as the amygdala, this is exacerbated by a spatial organization of  
23 neurons that results in local volume currents cancelling each other out rather than summing  
24 into a field large enough to be detected on the scalp (Silva, 2018). The current pattern of results –  
25 faster breakthrough times despite the absence of EEG signature – would be consistent with  
26 faces being processed nonconsciously by subcortical systems and would explain the behavioral  
27 advantage without concomitant SSVEP. This was our initial conclusion after seeing the results of  
28 Study 1. But the full pattern of results across all three studies makes this unlikely for at least two  
29 reasons.

30 First, if a subcortical pathway existed for fast processing and thus attentional orienting,  
31 one would reasonably assume that this system would engage the relevant cortical systems that

## Nonconscious face perception and curvilinearity

1 are specialized for processing the to-be-attended stimuli (Brooks et al., 2012). In contrast, we  
2 found no indication of cortical engagement. Though we note that there are studies which have  
3 found evidence of amygdala activation without concomitant cortical activation (see de Gelder,  
4 van Honk, & Tamietto, 2011). Second, and perhaps more important, we did not observe a faster  
5 breakthrough time for fearful faces compared to neutral faces. If anything, the breakthrough time  
6 for fearful faces was slower (though this was a small and insignificant difference). So, on the one  
7 hand, the current data cannot rule out subcortical nonconscious processing of fearful faces. On  
8 the other hand, if such processing occurs, it does so without engaging cortical face processing  
9 systems and without conferring an observable behavioral advantage.

### 10 **4.4. THE EFFECT OF MID-LEVEL VISUAL FEATURES ON B-CFS**

11 At first blush, the EEG and behavioral results of Studies 1 and 2 seem incompatible. We  
12 observed a significantly faster breakthrough time for faces than objects, but no face-selective  
13 SSVEP. We believe the results of Study 3 – faster breakthrough times for curvilinear than for  
14 rectilinear objects – elucidate the nature of this contradiction. Specifically, we interpret these  
15 results as evidence that the behavioral advantage for face processing is owed to the curvilinearity  
16 of faces rather than their high-level category membership. This interpretation is consistent with a  
17 growing literature that focuses on the importance of mid-level feature processing in the visual  
18 system.

19 Perhaps most relevant to the current work is a recent study by Moors, Wagemans, and de-  
20 Wit (2016) in which b-CFS was investigated as a function of curvature relative to fixation.  
21 Participants viewed the left half or the right half of a face in either an upright or inverted  
22 orientation presented to the left or right of fixation. Thus, faces were either presented with  
23 natural convex, or unnatural concave curvature relative to fixation. They found that curvature  
24 relative to fixation played an important role in faster breakthrough such that natural convexity  
25 was faster than concavity. This is consistent with prior work that found a preference for convex  
26 contours in area V4 of the macaque (Pasupathy & Connor, 1999). In the current studies, all  
27 curvilinear images (faces and objects) were convex relative to fixation, so the data cannot speak  
28 to the importance of convexity vs. concavity, but do support priority for curvilinear over  
29 rectilinear contours.

30 We presented all stimuli roughly centered at fixation, thus resulting in processing occurring  
31 primarily in regions of visual cortex with foveal and parafoveal receptive fields. This might

## Nonconscious face perception and curvilinearity

1 contribute to the observed nonconscious preference for curvilinear shapes. In macaque visual  
2 cortex there is a correlation between contour and eccentricity such that curvilinear contours are  
3 preferred in the central visual field, whereas rectilinear contours are preferred in the periphery  
4 (Srihasam, Vincent, & Livingstone, 2014). This observed relationship is particularly strong in  
5 early visual cortex, but a general preference for curvature has been observed to increase from  
6 lower to higher visual processing areas (Wilkinson et al., 2000; Ponce, Hartmann, &  
7 Livingstone, 2017) and might contribute to the organization of high-level visual cortex (Nasr,  
8 Echavarria, & Tootell, 2014; Srihasam et al., 2014; Andrews, Watson, Rice, & Hartley, 2015;  
9 Long, Yu, & Konkle, 2018).

10 Human face selective regions are particularly sensitive to curvilinearity (Caldara et al.,  
11 2006). Indeed, prosopagnosia (aka face-blindness) seems to selectively impair processing of  
12 curved edges and shapes (Kosslyn, Hamilton, & Bernstein, 1995). Similarly, a network of  
13 curvature sensitive regions in the macaque brain is adjacent to face-sensitive regions suggesting  
14 a possible functional relationship (Yue, Pourladian, Tootell, & Ungerleider, 2014). There is also  
15 an intriguing relationship between curvilinearity and animacy such that behavioral categorization  
16 is largely dependent on the amount of curvilinearity present in the image with images of animate  
17 things being more curvilinear than images of inanimate things (Long, Störmer, & Alvarez, 2017;  
18 Zachariou, Del Giacco, Ungerleider, & Yue, 2018; but also see Proklova, Kaiser, & Peelen,  
19 2016). Furthermore, a recent ERP study found evidence that animals and non-animals were  
20 distinguished nonconsciously (Zhu, Drewes, Peatfield, & Melcher, 2016).

21 Do mid-level features, particularly curvilinearity, account for observed differences in b-  
22 CFS paradigms? Our results are consistent with prior reports that would suggest so. Such  
23 features have been shown to drive the nonconscious processing of face identity (Gelbard-Sagiv,  
24 Faivre, Mudrik, & Koch, 2016), expression (Hedger et al., 2015), and dominance (Stein, Awad,  
25 Gayet, & Peelen, 2018; Gayet et al., 2014). Though it is yet unclear whether these features are  
26 themselves being processed nonconsciously (Pitts, Martínez, & Hillyard, 2012), or if the effect is  
27 due to partial awareness (Gelbard-Sagiv et al., 2016).

### 28 **4.5. TWO-THRESHOLD MODEL**

29 The contribution of mid-level features discussed above might account for many of the  
30 studies that have reported nonconscious processing of several different dimensions of face  
31 perception (for review see Axelrod et al., 2015), but others are less easily explained. For



## Nonconscious face perception and curvilinearity

1 example, Gobbini and colleagues (2013) report that faces oriented directly toward the viewer  
2 breakthrough faster than faces oriented slightly away. In this case, both conditions have near-  
3 identical curvilinearity and, importantly, convexity relative to fixation. What might drive this  
4 effect if not mid-level features?

5 One intriguing possibility is that nonconscious processing is not an all-or-none  
6 phenomenon, but rather can be considered a process of degree. This “two-threshold model of  
7 nonconscious processing” (Schlossmacher et al., 2017) posits that some features might only be  
8 processed when in the shallow depths of unconsciousness (Peremen & Lamy, 2014; Sterzer et  
9 al., 2014). In the context of this model, mid-level features might push faces from the depths  
10 toward the waterline of consciousness, at which point they are susceptible to privileged  
11 processing that ultimately causes a faster breakthrough. On the one hand, our results can be  
12 interpreted as being broadly consistent with such a model. On the other hand, we did not observe  
13 an advantage of fearful faces compared to neutral faces, or neutral faces compared to curvilinear  
14 objects. In other words, we did not observe an additive benefit of high-level category  
15 membership (face vs. object) beyond what could be explained by mid-level features (curvilinear  
16 vs. rectilinear).

### 17 **4.6. LIMITATIONS**

18 We have addressed several limitations of the current work in the prior discussion. Here we  
19 will briefly address three more. First, we used low opacity images (see Methods) to extend  
20 suppression time. It is possible this accounts for our inability to detect an EEG response, but this  
21 seems unlikely because we did observe a behavioral effect despite the low opacity. It should also  
22 be noted that the low opacity images evoked a sufficient signal in the *noCFS* conditions. Second,  
23 faces are a substantially more homogenous set of stimuli than are objects. It is possible that the  
24 repetition of homogenous oddballs facilitated a faster breakthrough time. We think this is  
25 unlikely given the design and the results of Study 3. In that study, we observed a faster  
26 breakthrough time for curvilinear objects than for rectilinear objects, despite there being no  
27 appreciable difference in the homogeneity of the seven exemplars within each condition. Third,  
28 it is possible that the observed curvilinearity effect was owed to contrast with the rectilinear  
29 continuous flash stimuli. We cannot exclude this possibility because these studies do not include  
30 a version in which the CFS stimuli are curvilinear. The substantial evidence for the importance  
31 of curvilinearity in both low-level and category-selective regions of the visual system leads us to

## Nonconscious face perception and curvilinearity

1 conclude that this explanation is unlikely. Further, both faces and curvilinear objects were  
2 suppressed with rectilinear CFS stimuli, so this could not account for the important observation  
3 that the breakthrough times did not differ for faces and curvilinear objects.

### 4 **4.7. CONCLUSIONS**

5 The results of these studies suggest that cortical face-selective regions do not engage in  
6 nonconscious face processing. Moreover, the observed advantage faces have over non-faces in  
7 breaking through flash suppression is likely due to their curvilinearity, rather than their high-  
8 level category membership. In the current series of studies, we were unable to find EEG  
9 evidence in support of the notion that faces are processed without benefit of conscious  
10 awareness. Paradoxically, we did observe a faster breakthrough time into conscious awareness  
11 for faces than for objects. Faster b-CFS is commonly interpreted to indicate nonconscious  
12 processing (Jiang et al., 2007). In a follow-up study, we found evidence that the mid-level visual  
13 features of a face – specifically, their curvilinearity – account for the faster breakthrough time,  
14 rather than their high-level category membership, and therefore are why we see no EEG  
15 signature of face perception.

16



## Nonconscious face perception and curvilinearity

### 1 **5. ACKNOWLEDGMENTS**

- 2 We thank Sabrina Halavi and Josue Parr for their contributions to this work. We also thank Sarah
- 3 Mohr and Anxu Wang for help in data collection. This research was funded, in part, by the
- 4 Kenyon Summer Science Program.

## Nonconscious face perception and curvilinearity

### 1 **6. REFERENCES**

- 2 Ales, J. M., Farzin, F., Rossion, B., & Norcia, A. M. (2012). An objective method for measuring  
3 face detection thresholds using the sweep steady-state visual evoked response. *Journal of*  
4 *Vision*, *12*(10), 18.
- 5 Andrews, T. J., Watson, D. M., Rice, G. E., & Hartley, T. (2015). Low-level properties of natural  
6 images predict topographic patterns of neural response in the ventral visual pathway.  
7 *Journal of Vision*, *15*(7), 3. doi:10.1167/15.7.3
- 8 Axelrod, V., Bar, M., & Rees, G. (2015). Exploring the unconscious using faces. *Trends in*  
9 *Cognitive Sciences*, *19*(1), 35-45. doi:10.1016/j.tics.2014.11.003
- 10 Baroni, F., van Kempen, J., Kawasaki, H., Kovach, C. K., Oya, H., Howard, M.  
11 A., . . . Tsuchiya, N. (2017). Intracranial markers of conscious face perception in humans.  
12 *NeuroImage*, *162*, 322-343. doi:10.1016/j.neuroimage.2017.08.074
- 13 Bigdely-Shamlo, N., Mullen, T., Kothe, C., Su, K.-M., & Robbins, K. A. (2015). The PREP  
14 pipeline: standardized preprocessing for large-scale EEG analysis. *Frontiers in*  
15 *Neuroinformatics*, *9*. doi:10.3389/fninf.2015.00016
- 16 Boremanse, A., Norcia, A. M., & Rossion, B. (2013). An objective signature for visual binding  
17 of face parts in the human brain. *Journal of Vision*, *13*(11). doi:10.1167/13.11.6
- 18 Brady, T. F., Konkle, T., Alvarez, G. A., & Oliva, A. (2008). Visual long-term memory has a  
19 massive storage capacity for object details. *Proceedings of the National Academy of*  
20 *Sciences*, *105*(38), 14325-14329.
- 21 Brooks, S. J., Savov, V., Allzén, E., Benedict, C., Fredriksson, R., & Schiöth, H. B. (2012).  
22 Exposure to subliminal arousing stimuli induces robust activation in the amygdala,  
23 hippocampus, anterior cingulate, insular cortex and primary visual cortex: a systematic  
24 meta-analysis of fMRI studies. *Neuroimage*, *59*(3), 2962-2973.  
25 doi:10.1016/j.neuroimage.2011.09.077
- 26 Caldara, R., Seghier, M. L., Rossion, B., Lazeyras, F., Michel, C., & Hauert, C.-A. (2006). The  
27 fusiform face area is tuned for curvilinear patterns with more high-contrasted elements in  
28 the upper part. *Neuroimage*, *31*(1), 313-319. doi:10.1016/j.neuroimage.2005.12.011
- 29 Calder, A. J., & Young, A. W. (2005). Understanding the recognition of facial identity and facial  
30 expression. *Nature Reviews Neuroscience*, *6*(8), 641-651. doi:10.1038/nrn1724

## Nonconscious face perception and curvilinearity

- 1 de Gelder, B., van Honk, J., & Tamietto, M. (2011). Emotion in the brain: of low roads, high  
2 roads and roads less travelled. *Nature Reviews Neuroscience*, *12*(7), 425.  
3 doi:10.1038/nrn2920-c1
- 4 Diano, M., Celeghin, A., Bagnis, A., & Tamietto, M. (2016). Amygdala Response to Emotional  
5 Stimuli without Awareness: Facts and Interpretations. *Frontiers in Psychology*, *7*.  
6 doi:10.3389/fpsyg.2016.02029
- 7 Faivre, N., Berthet, V., & Kouider, S. (2014). Sustained invisibility through crowding and  
8 continuous flash suppression: a comparative review. *Frontiers Psychology*, *5*.  
9 doi:10.3389/fpsyg.2014.00475
- 10 Gayet, S., Van der Stigchel, S., & Paffen, C. L. E. (2014). Breaking continuous flash  
11 suppression: competing for consciousness on the pre-semantic battlefield. *Frontiers in*  
12 *Psychology*, *5*. doi:10.3389/fpsyg.2014.00460
- 13 Gelbard-Sagiv, H., Faivre, N., Mudrik, L., & Koch, C. (2016). Low-level awareness  
14 accompanies “unconscious” high-level processing during continuous flash suppression.  
15 *Journal of Vision*, *16*(1), 3. doi:10.1167/16.1.3
- 16 Gobbini, M. I., Gors, J. D., Halchenko, Y. O., Hughes, H. C., & Cipolli, C. (2013). Processing of  
17 invisible social cues. *Consciousness and Cognition*, *22*(3), 765-770.  
18 doi:10.1016/j.concog.2013.05.002
- 19 Han, S., & Alais, D. (2018). Strength of continuous flash suppression is optimal when target and  
20 masker modulation rates are matched. *Journal of Vision*, *18*(3), 3. doi:10.1167/18.3.3
- 21 Han, S., Lunghi, C., & Alais, D. (2016). The temporal frequency tuning of continuous flash  
22 suppression reveals peak suppression at very low frequencies. *Scientific Reports*, *6*(1).  
23 doi:10.1038/srep35723
- 24 Harris, J. A., Wu, C.-T., & Woldorff, M. G. (2011). Sandwich masking eliminates both visual  
25 awareness of faces and face-specific brain activity through a feedforward mechanism.  
26 *Journal of vision*, *11*(7), 3-3.
- 27 Haxby, J. V., Hoffman, E. A., & Gobbini, M. I. (2000). The distributed human neural system for  
28 face perception. *Trends in Cognitive Sciences*, *4*(6), 223-233.
- 29 Hedger, N., Gray, K. L., Garner, M., & Adams, W. J. (2016). Are visual threats prioritized  
30 without awareness? A critical review and meta-analysis involving 3 behavioral paradigms  
31 and 2696 observers. *Psychol Bull*, *142*(9), 934-968. doi:10.1037/bul0000054

## Nonconscious face perception and curvilinearity

- 1 Hedger, N., Adams, W. J., & Garner, M. (2015). Fearful faces have a sensory advantage in the  
2 competition for awareness. *Journal of Experimental Psychology: Human Perception and*  
3 *Performance*, 41(6), 1748.
- 4 Heering, A. D., Beauny, A., Vuillaume, L., Salvesen, L., & Cleeremans, A. (2019). SSVEP as a  
5 no-report paradigm to capture phenomenal experience of complex visual images.  
6 doi:10.1101/588236
- 7 Henson, R. N., Mouchlianitis, E., Matthews, W. J., & Kouider, S. (2008). Electrophysiological  
8 correlates of masked face priming. *Neuroimage*, 40(2), 884-895.  
9 doi:10.1016/j.neuroimage.2007.12.003
- 10 Hoffmann, M., Mothes-Lasch, M., Miltner, W. H., & Straube, T. (2015). Brain activation to  
11 briefly presented emotional words: effects of stimulus awareness. *Human Brain Mapping*,  
12 36(2), 655-665. doi:10.1002/hbm.22654
- 13 Izatt, G., Dubois, J., Faivre, N., & Koch, C. (2014). A direct comparison of unconscious face  
14 processing under masking and interocular suppression. *frontiers in Psychology*, 5, 659.  
15 doi:10.3389/fpsyg.2014.00659
- 16 Team, J. A. S. P. (2019). JASP (Version 0.10.2).
- 17 Jeffreys, H. (1961). *Theory of Probability* (3 ed.). Oxford UK: Oxford University Press.
- 18 Jessen, S., & Grossmann, T. (2014). Unconscious discrimination of social cues from eye whites  
19 in infants. *Proceedings of the National Academy of Sciences*, 111(45), 16208-16213.  
20 doi:10.1073/pnas.1411333111
- 21 Jiang, Y., Costello, P., & He, S. (2007). Processing of invisible stimuli: advantage of upright  
22 faces and recognizable words in overcoming interocular suppression. *Psychological*  
23 *Science*, 18(4), 349-355. doi:10.1111/j.1467-9280.2007.01902.x
- 24 Jiang, Y., & He, S. (2006). Cortical responses to invisible faces: dissociating subsystems for  
25 facial-information processing. *Current Biology*, 16(20), 2023-2029.  
26 doi:10.1016/j.cub.2006.08.084
- 27 Jiang, Y., Shannon, R. W., Vizueta, N., Bernat, E. M., Patrick, C. J., & He, S. (2009). Dynamics  
28 of processing invisible faces in the brain: automatic neural encoding of facial expression  
29 information. *Neuroimage*, 44(3), 1171-1177. doi:10.1016/j.neuroimage.2008.09.038
- 30 Kosslyn, S. M., Hamilton, S. E., & Bernstein, J. H. (1995). The perception of curvature can be  
31 selectively disrupted in prosopagnosia. *Brain and cognition*, 27(1), 36-58.

## Nonconscious face perception and curvilinearity

- 1 Kume, Y., Maekawa, T., Urakawa, T., Hironaga, N., Ogata, K., Shigyo, M., & Tobimatsu, S.  
2 (2016). Neuromagnetic evidence that the right fusiform face area is essential for human  
3 face awareness: An intermittent binocular rivalry study. *Neuroscience Research*, *109*, 54-  
4 62. doi:10.1016/j.neures.2016.02.004
- 5 Liu-Shuang, J., Norcia, A. M., & Rossion, B. (2014). An objective index of individual face  
6 discrimination in the right occipito-temporal cortex by means of fast periodic oddball  
7 stimulation. *Neuropsychologia*, *52*, 57-72. doi:10.1016/j.neuropsychologia.2013.10.022
- 8 Long, B., Störmer, V. S., & Alvarez, G. A. (2017). Mid-level perceptual features contain early  
9 cues to animacy. *Journal of Vision*, *17*(6), 20. doi:10.1167/17.6.20
- 10 Long, B., Yu, C. P., & Konkle, T. (2018). Mid-level visual features underlie the high-level  
11 categorical organization of the ventral stream. *Proceedings of the National Academy of*  
12 *Sciences*, *115*(38), E9015-E9024. doi:10.1073/pnas.1719616115
- 13 Lundqvist, D., & Litton, J. E. (1998). The Averaged Karolinska Directed Emotional Faces -  
14 AKDEF, CD ROM from Department of Clinical Neuroscience, Psychology section,  
15 Karolinska Institutet, ISBN 91-630-7164-9.
- 16 Moors, P., Wagemans, J., & de-Wit, L. (2016). Faces in commonly experienced configurations  
17 enter awareness faster due to their curvature relative to fixation. *PeerJ*, *4*, e1565.  
18 doi:10.7717/peerj.1565
- 19 Mudrik, L., Gelbard-Sagiv, H., Faivre, N., & Koch, C. (2013). Knowing where without knowing  
20 what: partial awareness and high-level processing in continuous flash suppression. *Journal*  
21 *of Vision*, *13*(9), 1103-1103. doi:10.1167/13.9.1103
- 22 Nasr, S., Echavarria, C. E., & Tootell, R. B. H. (2014). Thinking outside the box: rectilinear  
23 shapes selectively activate scene-selective cortex. *Journal of Neuroscience*, *34*(20), 6721-  
24 6735. doi:10.1523/JNEUROSCI.4802-13.2014
- 25 Navajas, J., Ahmadi, M., & Quiñan Quiroga, R. (2013). Uncovering the mechanisms of conscious  
26 face perception: a single-trial study of the n170 responses. *Journal of Neuroscience*, *33*(4),  
27 1337-1343. doi:10.1523/JNEUROSCI.1226-12.2013
- 28 Norcia, A. M., Appelbaum, L. G., Ales, J. M., Cottareau, B. R., & Rossion, B. (2015). The  
29 steady-state visual evoked potential in vision research: A review. *Journal of Vision*, *15*(6),  
30 4. doi:10.1167/15.6.4

## Nonconscious face perception and curvilinearity

- 1 Pasupathy, A., & Connor, C. E. (1999). Responses to contour features in macaque area V4.  
2 *Journal of neurophysiology*, 82(5), 2490-2502.
- 3 Peirce, J., Gray, J. R., Simpson, S., MacAskill, M., Höchenberger, R., Sogo, H., . . . Lindeløv, J.  
4 K. (2019). PsychoPy2: Experiments in behavior made easy. *Behavior Research Methods*.  
5 doi:10.3758/s13428-018-01193-y
- 6 Peremen, Z., & Lamy, D. (2014). Comparing unconscious processing during continuous flash  
7 suppression and meta-contrast masking just under the limen of consciousness. *Frontiers in*  
8 *Psychology*, 5. doi:10.3389/fpsyg.2014.00969
- 9 Pessoa, L., & Adolphs, R. (2010). Emotion processing and the amygdala: from a ‘low road’ to  
10 ‘many roads’ of evaluating biological significance. *Nature Reviews Neuroscience*, 11(11),  
11 773-783. doi:10.1038/nrn2920
- 12 Peters, M. A. K., & Lau, H. (2015). Human observers have optimal introspective access to  
13 perceptual processes even for visually masked stimuli. *eLife*, 4, e09651.
- 14 Pitts, M. A., Martínez, A., & Hillyard, S. A. (2012). Visual processing of contour patterns under  
15 conditions of inattention blindness. *Journal of Cognitive Neuroscience*, 24(2), 287-303.  
16 doi:10.1162/jocn\_a\_00111
- 17 Ponce, C. R., Hartmann, T. S., & Livingstone, M. S. (2017). End-Stopping Predicts Curvature  
18 Tuning along the Ventral Stream. *Journal of Neuroscience*, 37(3), 648-659.  
19 doi:10.1523/JNEUROSCI.2507-16.2016
- 20 Proklova, D., Kaiser, D., & Peelen, M. V. (2016). Disentangling Representations of Object  
21 Shape and Object Category in Human Visual Cortex: The Animate-Inanimate Distinction.  
22 *Journal of Cognitive Neuroscience*, 28(5), 680-692. doi:10.1162/jocn\_a\_00924
- 23 Reiss, J. E., & Hoffman, J. E. (2007). Disruption of early face recognition processes by object  
24 substitution masking. *Visual Cognition*, 15(7), 789-798. doi:10.1080/13506280701307035
- 25 Rodríguez, V., Thompson, R., Stokes, M., Brett, M., Alvarez, I., Valdes-Sosa, M., & Duncan, J.  
26 (2012). Absence of face-specific cortical activity in the complete absence of awareness:  
27 converging evidence from functional magnetic resonance imaging and event-related  
28 potentials. *Journal of Cognitive Neuroscience*, 24(2), 396-415.
- 29 Schlossmacher, I., Junghöfer, M., Straube, T., & Bruchmann, M. (2017). No differential effects  
30 to facial expressions under continuous flash suppression: An event-related potentials study.  
31 *Neuroimage*, 163, 276-285. doi:10.1016/j.neuroimage.2017.09.034

## Nonconscious face perception and curvilinearity

- 1 Shafto, J. P., & Pitts, M. A. (2015). Neural Signatures of Conscious Face Perception in an  
2 Inattentional Blindness Paradigm. *Journal of Neuroscience*, *35*(31), 10940-10948.  
3 doi:10.1523/JNEUROSCI.0145-15.2015
- 4 Silva, F. H. L. D. (2018). *Niedermeyer's Electroencephalography*. Oxford University Press.
- 5 Srihasam, K., Vincent, J. L., & Livingstone, M. S. (2014). Novel domain formation reveals  
6 proto-architecture in inferotemporal cortex. *Nature neuroscience*, *17*(12), 1776.
- 7 Stein, T., Awad, D., Gayet, S., & Peelen, M. V. (2018). Unconscious processing of facial  
8 dominance: The role of low-level factors in access to awareness. *Journal of Experimental*  
9 *Psychology: General*, *147*(11), e1-e13. doi:10.1037/xge0000521
- 10 Stein, T., & Sterzer, P. (2014). Unconscious processing under interocular suppression: getting  
11 the right measure. *Frontiers in Psychology*, *5*. doi:10.3389/fpsyg.2014.00387
- 12 Sterzer, P., Jalkanen, L., & Rees, G. (2009). Electromagnetic responses to invisible face stimuli  
13 during binocular suppression. *Neuroimage*, *46*(3), 803-808.  
14 doi:10.1016/j.neuroimage.2009.02.046
- 15 Sterzer, P., Stein, T., Ludwig, K., Rothkirch, M., & Hesselmann, G. (2014). Neural processing of  
16 visual information under interocular suppression: a critical review. *Frontiers in psychology*,  
17 *5*, 453.
- 18 Straube, T., Dietrich, C., Mothes-Lasch, M., Mentzel, H. J., & Miltner, W. H. (2010). The  
19 volatility of the amygdala response to masked fearful eyes. *Human Brain Mapping*, *31*(10),  
20 1601-1608. doi:10.1002/hbm.20960
- 21 Strohminger, N., Gray, K., Chituc, V., Heffner, J., Schein, C., & Heagins, T. B. (2016). The  
22 MR2: A multi-racial, mega-resolution database of facial stimuli. *Behavioral Research*  
23 *Methods*, *48*(3), 1197-1204. doi:10.3758/s13428-015-0641-9
- 24 Suzuki, M., & Noguchi, Y. (2013). Reversal of the face-inversion effect in N170 under  
25 unconscious visual processing. *Neuropsychologia*, *51*(3), 400-409.  
26 doi:10.1016/j.neuropsychologia.2012.11.021
- 27 Tamietto, M., & de Gelder, B. (2010). Neural bases of the non-conscious perception of  
28 emotional signals. *Nature Reviews Neuroscience*, *11*(10), 697-709. doi:10.1038/nrn2889
- 29 Tsuchiya, N., & Koch, C. (2005). Continuous flash suppression reduces negative afterimages.  
30 *Nature Neuroscience*, *8*(8), 1096-1101.



## Nonconscious face perception and curvilinearity

- 1 Wilkinson, F., James, T. W., Wilson, H. R., Gati, J. S., Menon, R. S., & Goodale, M. A. (2000).  
2 An fMRI study of the selective activation of human extrastriate form vision areas by radial  
3 and concentric gratings. *Current Biology*, *10*(22), 1455-1458.
- 4 Willenbockel, V., Sadr, J., Fiset, D., Horne, G. O., Gosselin, F., & Tanaka, J. W. (2010).  
5 Controlling low-level image properties: the SHINE toolbox. *Behavioral Research Methods*,  
6 *42*(3), 671-684. doi:10.3758/BRM.42.3.671
- 7 Yue, X., Pourladian, I. S., Tootell, R. B. H., & Ungerleider, L. G. (2014). Curvature-processing  
8 network in macaque visual cortex. *Proceedings of the National Academy of Sciences*,  
9 *111*(33), E3467-75. doi:10.1073/pnas.1412616111
- 10 Zachariou, V., Del Giacco, A. C., Ungerleider, L. G., & Yue, X. (2018). Bottom-up processing  
11 of curvilinear visual features is sufficient for animate/inanimate object categorization.  
12 *Journal of Vision*, *18*(12), 3. doi:10.1167/18.12.3
- 13 Zhan, M., Engelen, T., & de Gelder, B. (2018). Influence of continuous flash suppression mask  
14 frequency on stimulus visibility. *Neuropsychologia*.  
15 doi:10.1016/j.neuropsychologia.2018.05.012
- 16 Zhu, W., Drewes, J., Peatfield, N. A., & Melcher, D. (2016). Differential Visual Processing of  
17 Animal Images, with and without Conscious Awareness. *Frontiers in Human*  
18 *Neuroscience*, *10*, 513. doi:10.3389/fnhum.2016.00513
- 19 Zhu, W., Drewes, J., & Melcher, D. (2016). Time for Awareness: The Influence of Temporal  
20 Properties of the Mask on Continuous Flash Suppression Effectiveness. *PLoS One*, *11*(7),  
21 e0159206. doi:10.1371/journal.pone.0159206  
22
